# Supplementary material for: Anthocyanins and Carotenoids Characterization in Flowers and Leaves of Cyclamen Genotypes Linked with Bioactivities Using Multivariate Analysis Techniques
Source: MDPI journal article supplement (doi:10.3390/antiox11061126), 2022-06-07

**Supplementary Table S1.** Retention time (Rt), mass spectral data, and tentative identification of anthocyanins in Cyclamen flowers

| Peak no. | R <sub>t</sub><br>(min) | UV $\lambda_{\text{max}}$<br>(nm) | [M+H] <sup>+</sup><br>(m/z) | Compound                    | Chemical formula                                |
|----------|-------------------------|-----------------------------------|-----------------------------|-----------------------------|-------------------------------------------------|
| 1        | 19.39                   | 282, 516                          | 611                         | Cyanidin 3,5-di-O-glucoside | C <sub>27</sub> H <sub>31</sub> O <sub>16</sub> |
| 2        | 24.66                   | 277, 330, 516                     | 625                         | Peonidin 3,5-di-O-glucoside | C <sub>28</sub> H <sub>33</sub> O <sub>16</sub> |
| 3        | 26.22                   | 277, 343, 531                     | 655                         | Malvidin 3,5-di-O-glucoside | C <sub>29</sub> H <sub>35</sub> O <sub>17</sub> |
| 4        | 28.12                   | 282, 330, 521                     | 609                         | Peonidin 3-rutinoside       | C <sub>28</sub> H <sub>33</sub> O <sub>15</sub> |
| 5        | 31.33                   | 282, 330, 516                     | 463                         | Peonidin 3-O-glucoside      | C <sub>22</sub> H <sub>23</sub> O <sub>11</sub> |
| 6        | 33.31                   | 277, 348, 531                     | 493                         | Malvidin 3-O-glucoside      | C <sub>23</sub> H <sub>25</sub> O <sub>12</sub> |
| 7        | 34.45                   | 277, 348, 531                     | 639                         | Malvidin 3-rutinoside       | C <sub>29</sub> H <sub>35</sub> O <sub>16</sub> |

Supplementary Figure S1. Chemical structures of isolated carotenoids

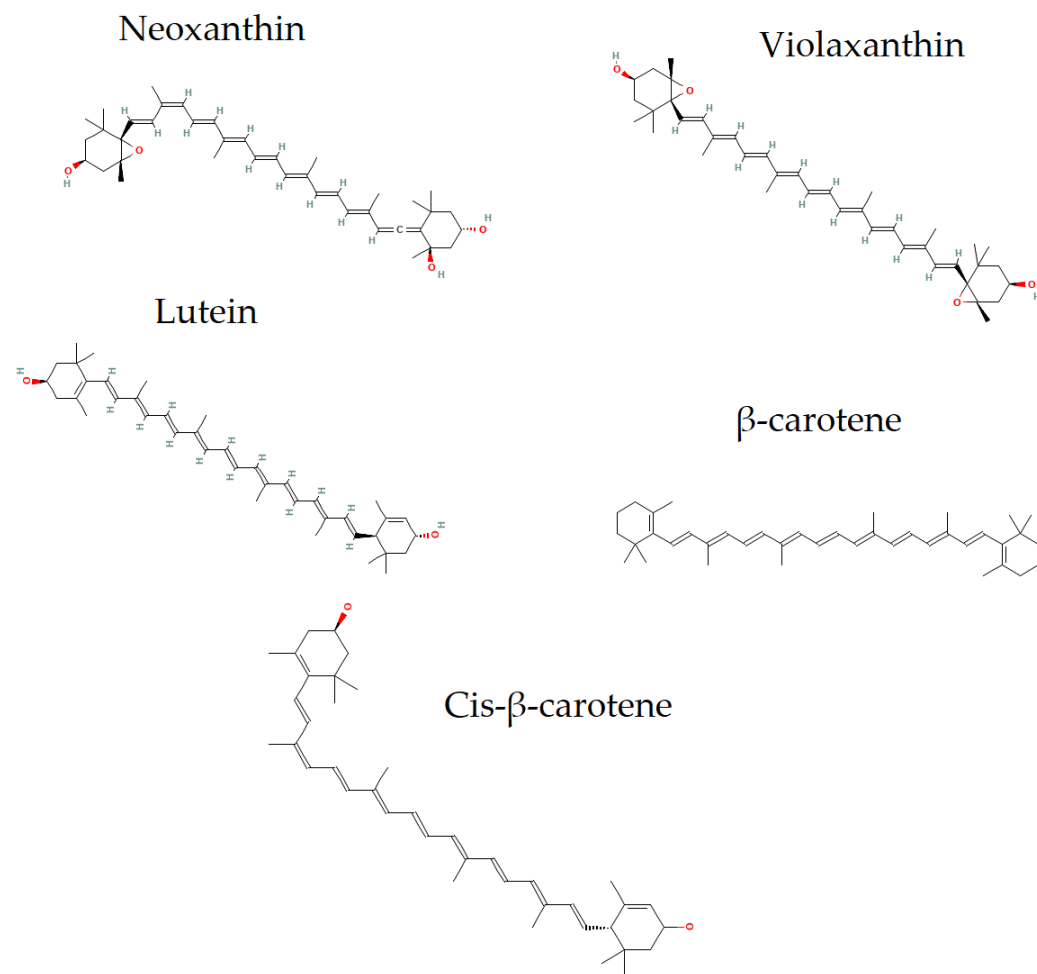

Supplementary Figure S2. Chemical structures of isolated anthocyanins

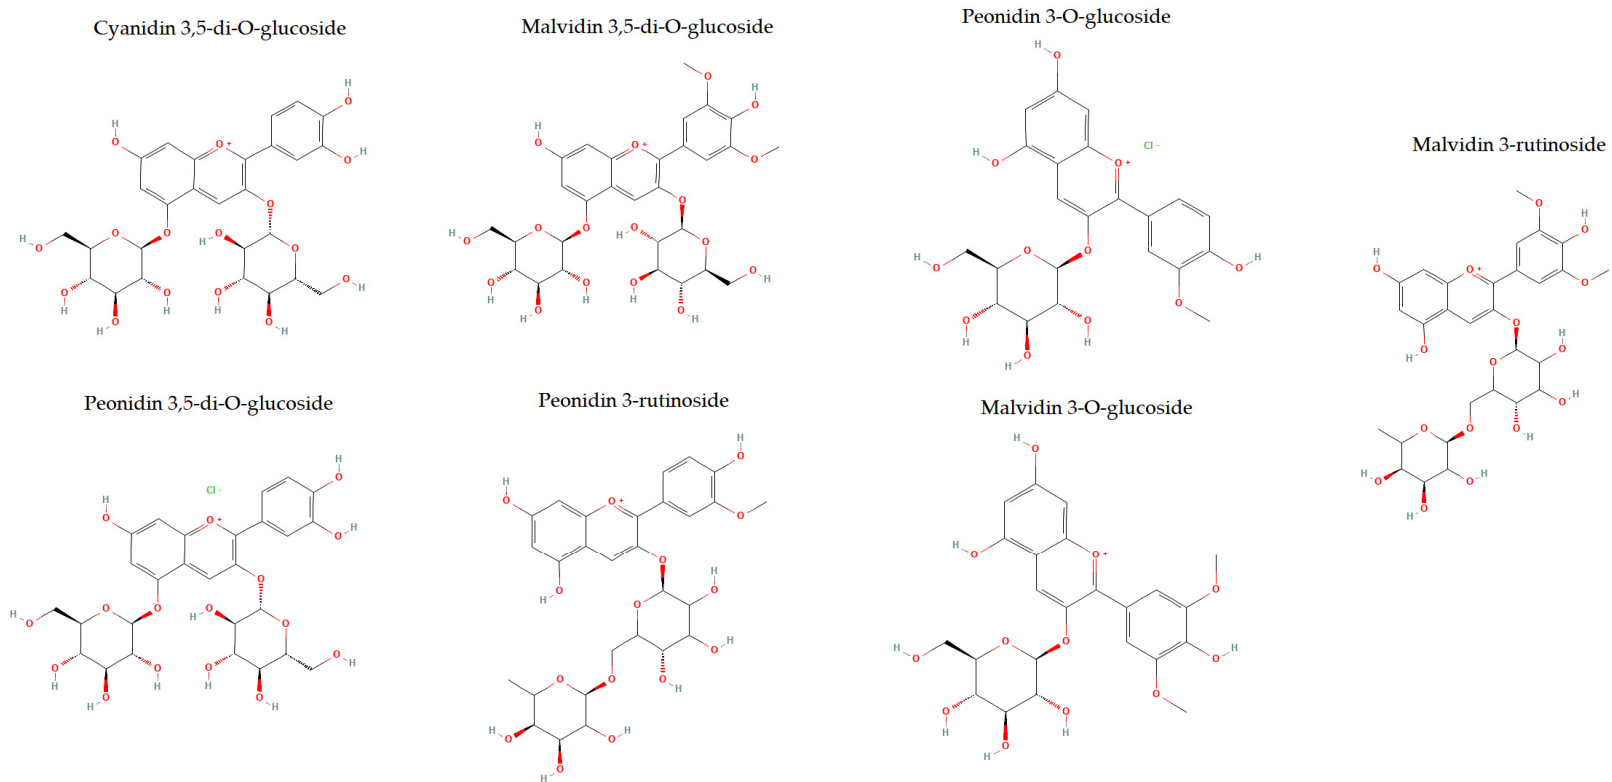

Supplement: s1 [file s1]
